# Supplementary material
Source: MDPI journal article supplement (https://www.mdpi.com/2673-4591/10/1/2)

# Optimization of Focused Ion Beam patterning parameters for direct integration of plasmonic nanostructures on Silicon photodiode

E. Scattolo\*<sup>1,2</sup>, A. Cian <sup>1</sup>, D. Giubertoni <sup>1</sup>, G. Paternoster <sup>1</sup>, L. Petti <sup>2</sup>, P. Lugli <sup>2</sup>

<sup>1</sup> Sensors and Devices Center, Bruno Kessler Foundation, Trento, I-38123, Italy;

<sup>2</sup> Libera Università Di Bolzano, Bozen, Italy

\* Correspondence: [escattolo@fbk.eu](mailto:escattolo@fbk.eu);

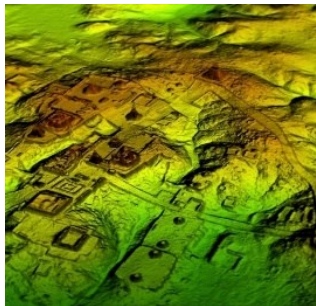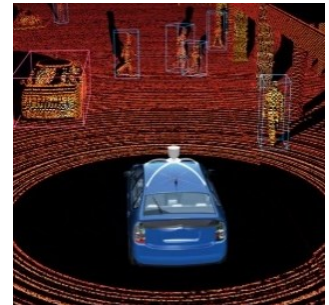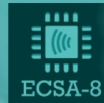

The 8th International Electronic Conference on  
Sensors and Applications  
01-15 NOVEMBER 2021 | ONLINE

# Problem statement

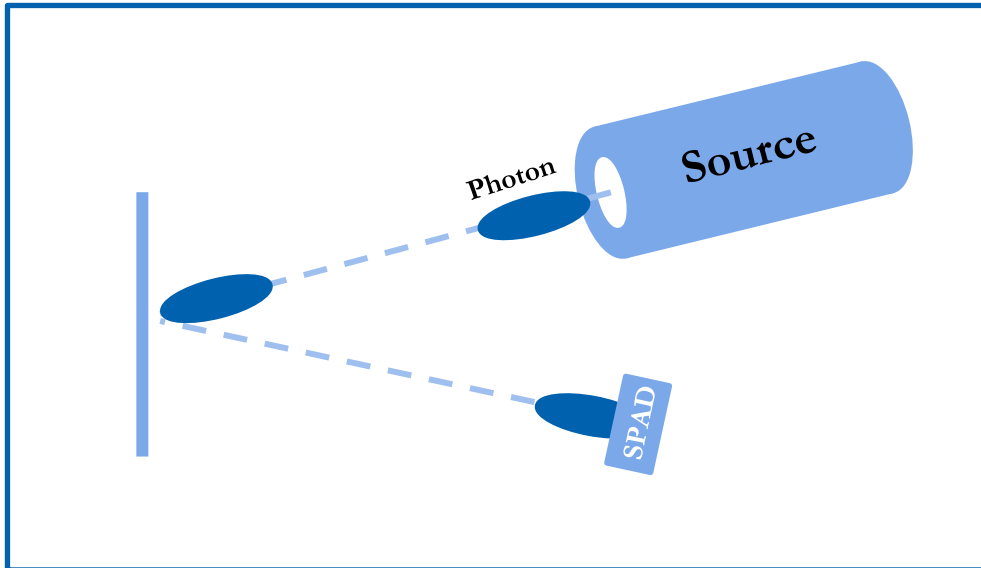

N E A R - I N F R A R E D

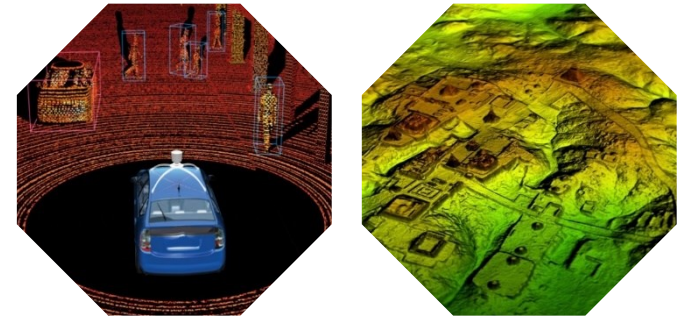

Applications of single photon  
counting optical sensors

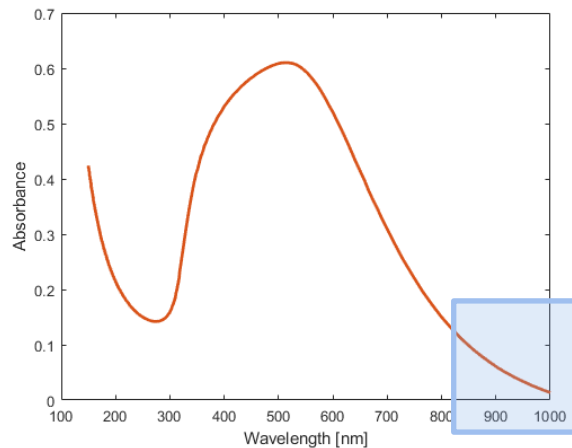

QE hindered by Silicon  
low absorption coefficient

# Proposed Approach

## Plasmonic nanograting supporting surface plasmon polaritons

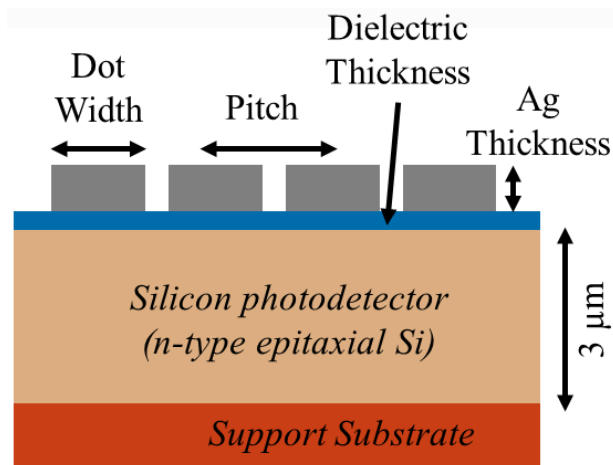

- Easy integration
- Easy plasmonic properties tunable

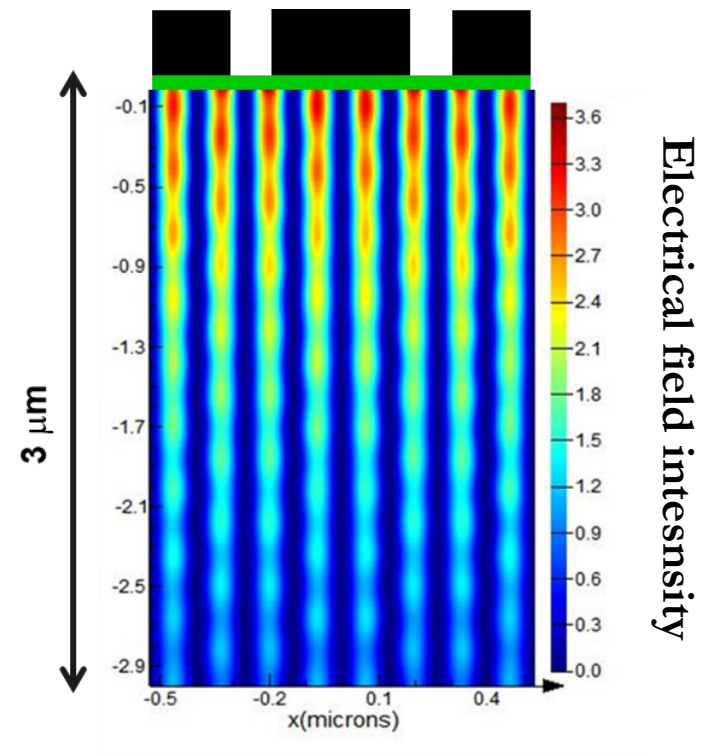

# Simulation results

Theoretical collision cascade of Au gold ions in silver  
layer from Montecarlo simulation

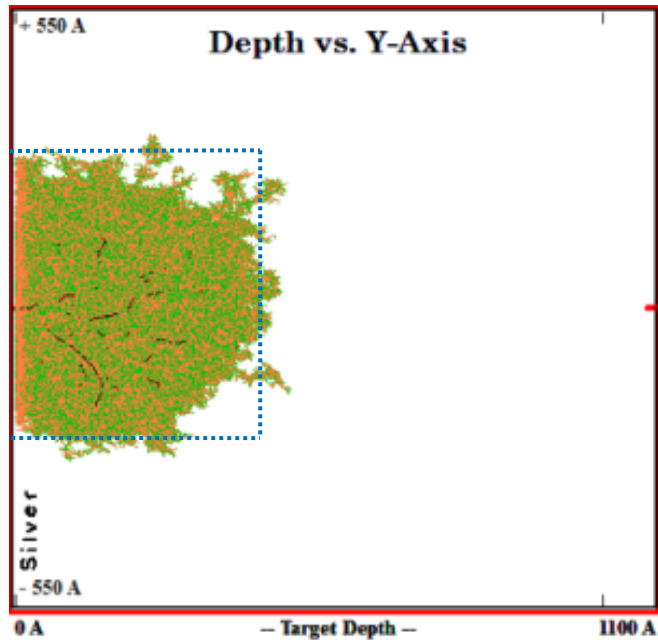

Theoretical collision cascade of gold double charged ions at 35 keV in silver layer exhibiting a box shape (blue dotted line) close to the ideal configuration, with a sputter yield of 15.6 silver atoms per incident ion.

Absorption normalized to Si with Perfect AntiReflective  
Coating (PARC) at wavelength 950 nm (NIR)

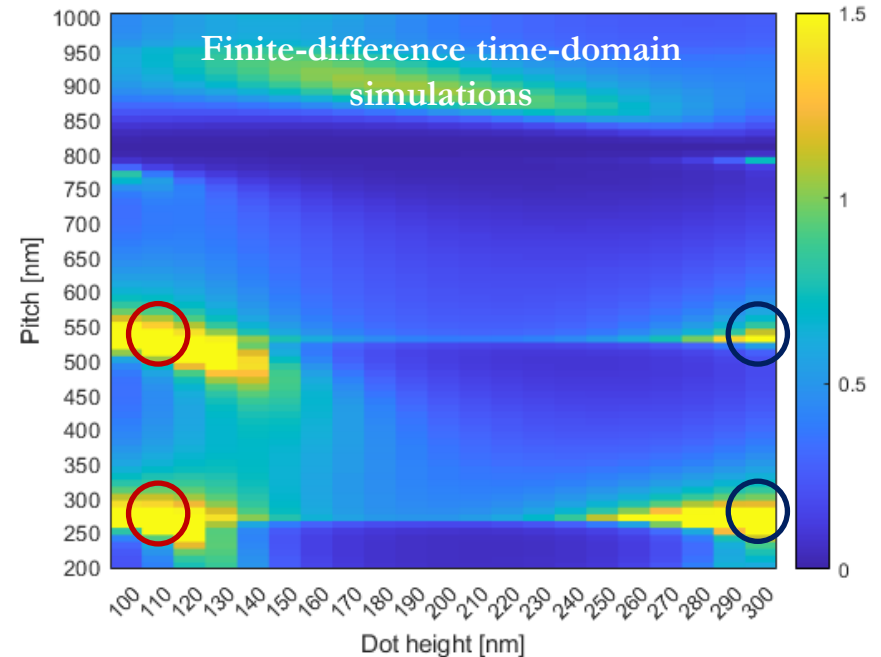

**Pitch = 530nm**  
**Metal thickness = 110 nm**  
**Pitch = 260nm**  
**Metal thickness = 110 nm**

**Pitch = 530nm**  
**Metal thickness = 290 nm**  
**Pitch = 260nm**  
**Metal thickness = 290 nm**

## Focused Ion Beam equipment in FBK's facilities

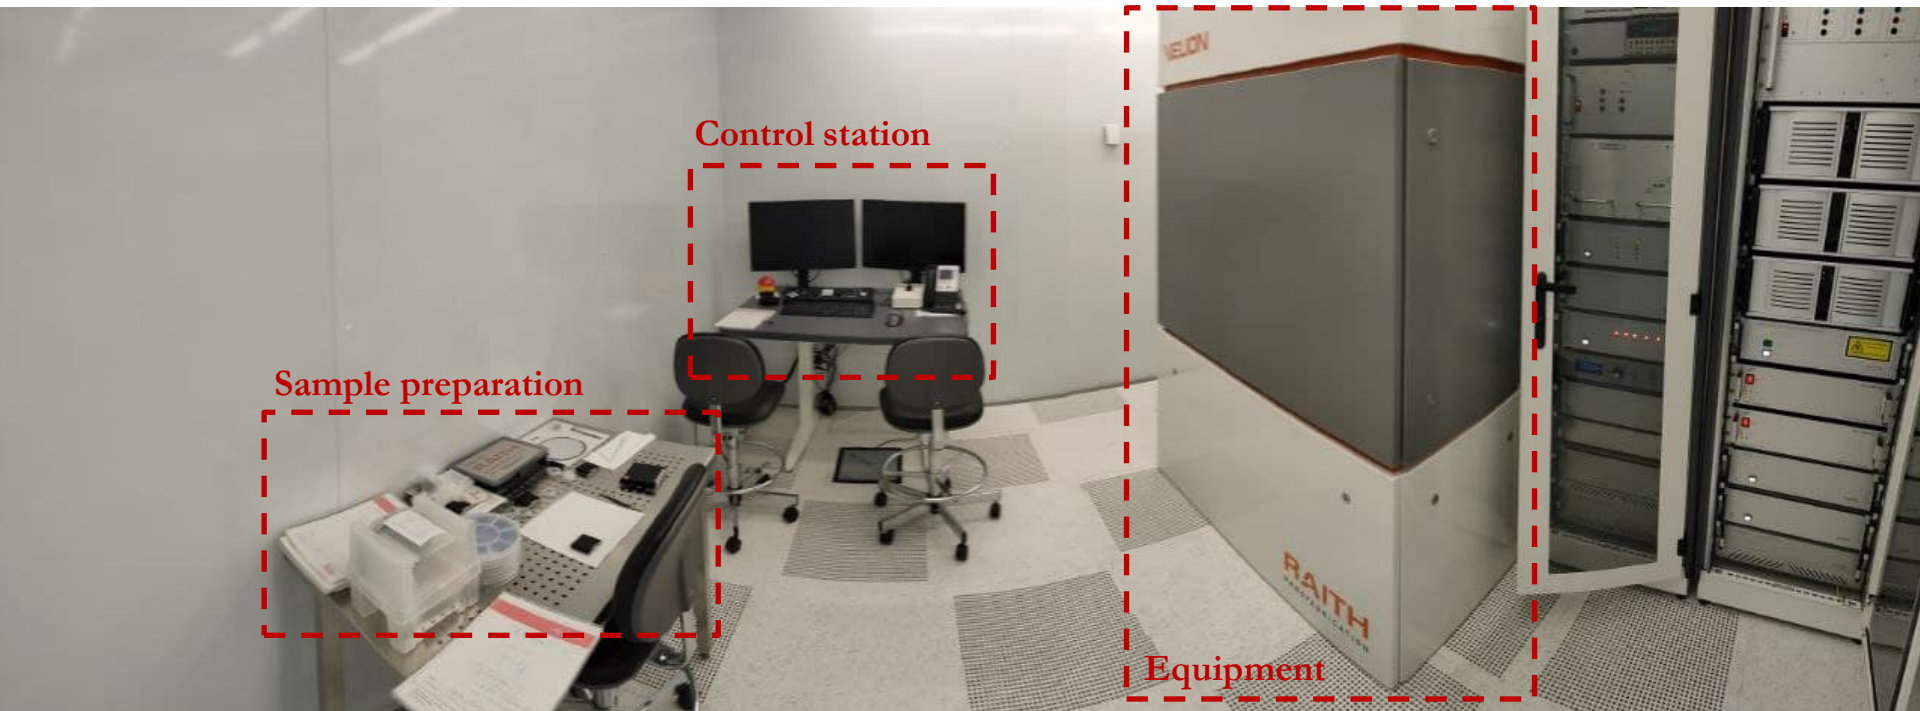

**Focused ion beam** - eutectic liquid alloy Au/Si/Ge source

**Electron beam**

**Optical microscope**

## Focused Ion Beam working principles

Sputtering yield:

$$Y = \frac{\text{number of incident ions}}{\text{number of sputtered atoms}}$$

Y depends on:

- Ion's mass and charge
- Sample material

Quantity of removed materials depends on:

- **Dose:** superficial density of charge [uC/cm<sup>2</sup>]
- **Dwell time:** time spent on a single spot [ms]
- **Current Beam:** the value of the current of the beam [pA]
- **Loops:** numer of loops in which the Dose is divided in
- **Scan direction**

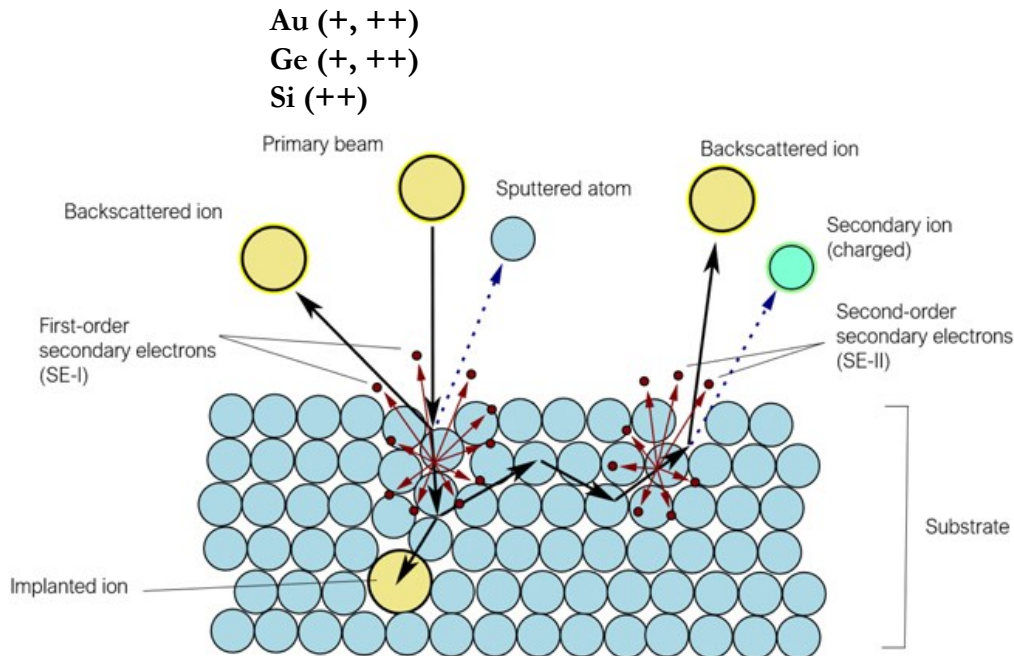

## Compatibility of the proposed structures with Focused Ion Beam technique

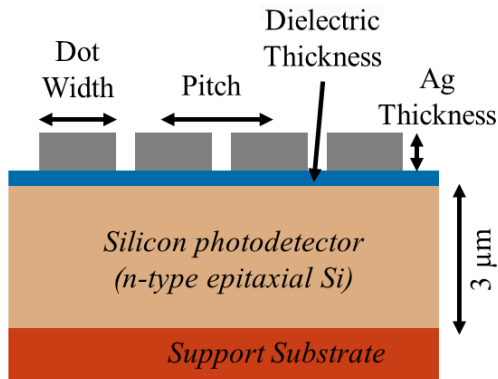

**Pitch** = 530nm  
**Metal thickness** = 110 nm

Most reliable structure configuration

**Pitch** = 260nm  
**Metal thickness** = 110 nm

High aspect ratio and the low beam spot size required

**Pitch** = 530nm  
**Metal thickness** = 290 nm

**Pitch** = 260nm  
**Metal thickness** = 290 nm

Long dwell time leading to  
i) Low lateral definition of the structures;  
ii) too long patterning time;

# SEM characterization

1D

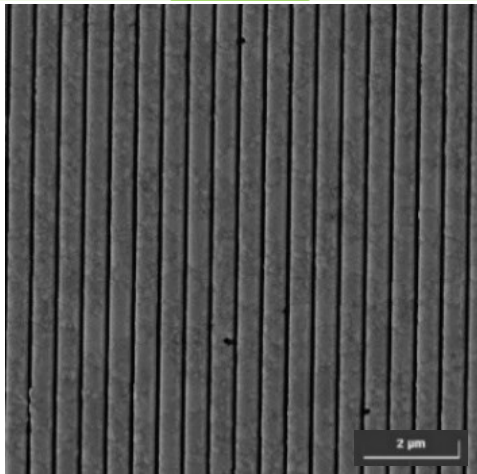

2D

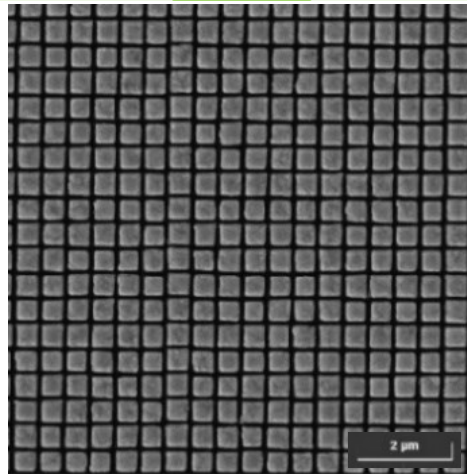

High reliability

High dimensional conformaty

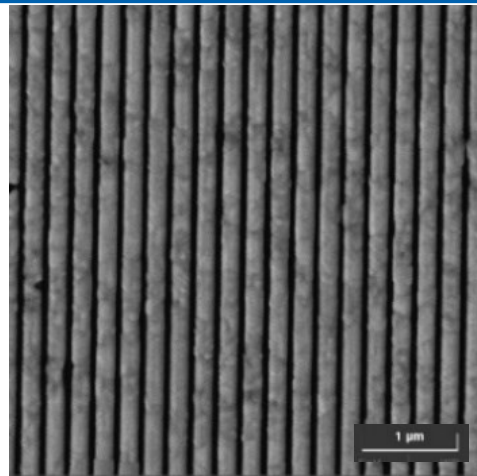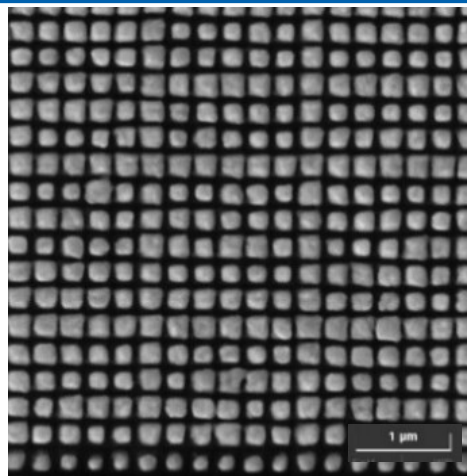

Low reliability

Low dimensional conformaty

# Dark current values

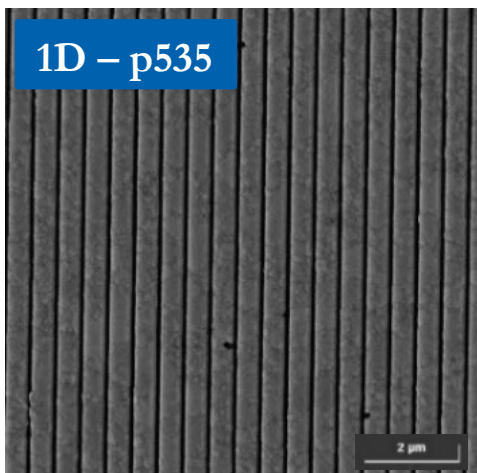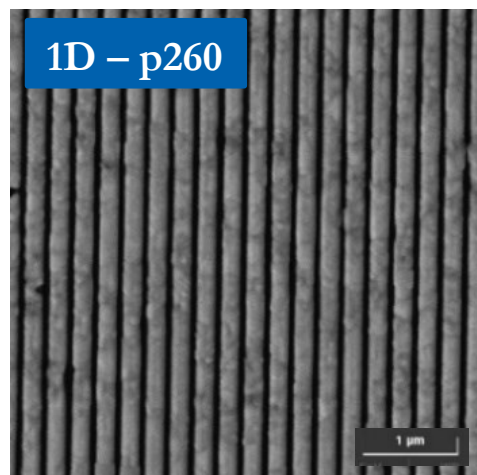

## Reference

21 pA

| FIB 1D      | FIB 2D      |
|-------------|-------------|
| p-535,h-110 | p-535,h-110 |
| 41 pA       | 25 pA       |
| p-260,h-110 | p-260,h-110 |
| 10 pA       | 37 pA       |

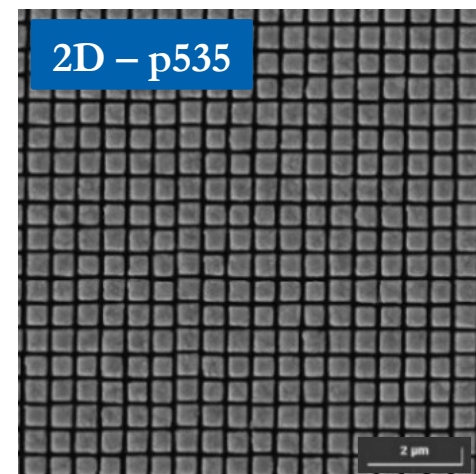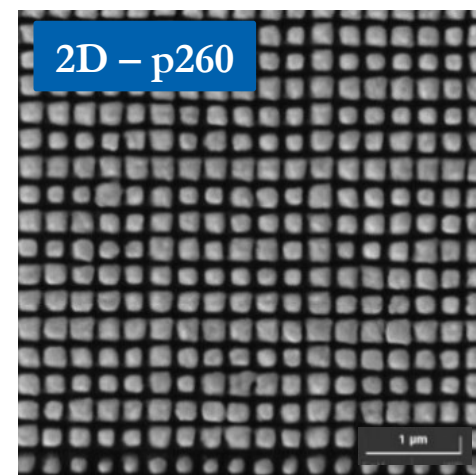

# Conclusion

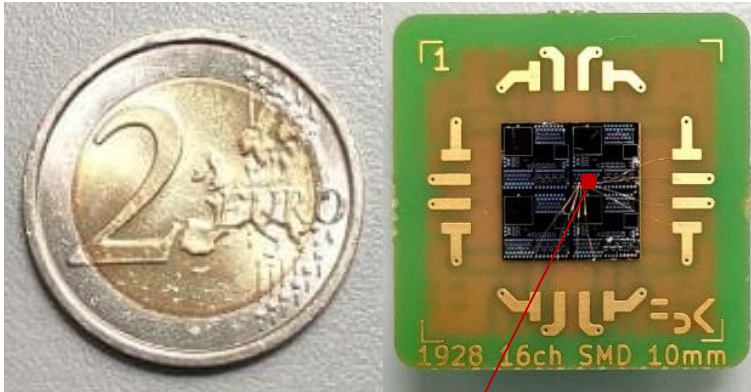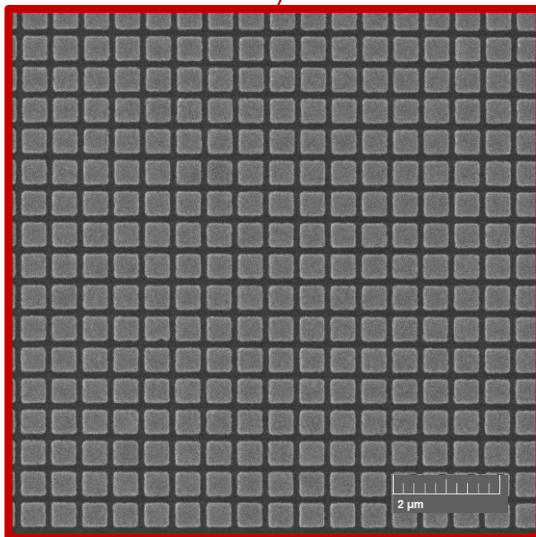

**Successful integration** of metallic plasmonic nanostructures on active device without inducing any irreversible damage in the active region of the device.

This result paves the way to further applications given by the integration of plasmonic nanostructures with photodetectors, such as **plasmonic biosensors all-in-one**

# Optimization of the Focused Ion Beam patterning parameters for direct integration of plasmonic nanostructures on Silicon photodiode

## CONTACT

Elia Scattolo

[escattolo@fbk.eu](mailto:escattolo@fbk.eu)

[escattolo@unibz.it](mailto:escattolo@unibz.it)

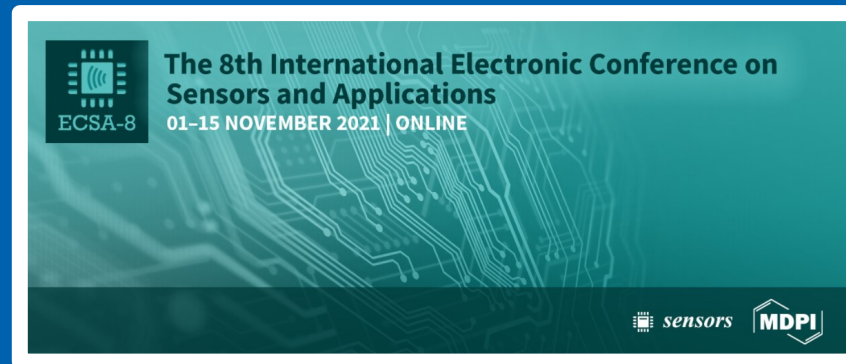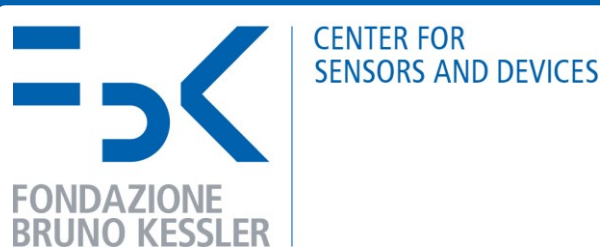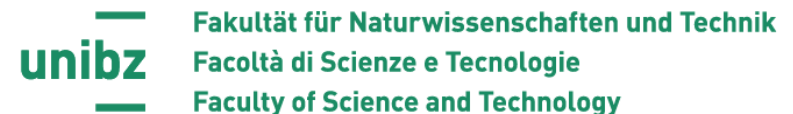

Supplement: s1 [file s1]
